# Supplementary material for: Computational Insight into Intraspecies Distinctions in Pseudoalteromonas distincta: Carotenoid-like Synthesis Traits and Genomic Heterogeneity
Source: MDPI journal article supplement (doi:10.3390/ijms24044158), 2023-02-19
Supplement: s1 [file s1]

**Table S2.** List of accession numbers for genomes used in phylogenetic analyses

| Strain                                                   | GenBank Accession No.  |
|----------------------------------------------------------|------------------------|
| <i>Alteromonas macleodii</i> ATCC 27126 <sup>r</sup>     | GCF_000172635.2        |
| <i>Pseudoalteromonas agarivorans</i> DSM 14585T          | GCF_002310855.1        |
| <i>Pseudoalteromonas aliena</i> SW19T                    | GCF_014905615.1        |
| <i>Pseudoalteromonas amylolytica</i> JW1T                | GCF_001854605.1        |
| <i>Pseudoalteromonas arabiensis</i> JCM 17292T           | GCF_001550155.1        |
| <i>Pseudoalteromonas arctica</i> A 37-1-2T               | GCF_000238395.3        |
| <i>Pseudoalteromonas aurantia</i> 208T                   | GCF_014858725.1        |
| <i>Pseudoalteromonas byunsanensis</i> JCM 12483T         | GCF_001854475.1        |
| <i>Pseudoalteromonas caenipelagi</i> JBTF-M23T           | GCF_013140855.1        |
| <i>Pseudoalteromonas carrageenovora</i> ATCC 43555T      | GCF_900239935.1        |
| <i>Pseudoalteromonas carrageenovora</i> IAM 12662T       | GCF_014925295.1        |
| <i>Pseudoalteromonas carrageenovora</i> NBRC 12985T      | GCF_006539245.1        |
| <i>Pseudoalteromonas citrea</i> DSM 8771T                | GCF_000238375.3        |
| <i>Pseudoalteromonas denitrificans</i> DSM 6059T         | GCF_900112265.1        |
| <b>*<i>Pseudoalteromonas distincta</i> 16-SW-7</b>       | <b>GCF_005877035.1</b> |
| <b>*<i>Pseudoalteromonas distincta</i> 2-2A-13</b>       | <b>JANIHL010000000</b> |
| <b>*<i>Pseudoalteromonas distincta</i> ANT/505</b>       | <b>GCF_000212655.2</b> |
| <b>*<i>Pseudoalteromonas distincta</i> ATCC 700518T</b>  | <b>GCF_000814675.1</b> |
| <b>*<i>Pseudoalteromonas distincta</i> U2A</b>           | <b>GCF_008370225.1</b> |
| <i>Pseudoalteromonas donghaensis</i> HJ51T               | GCF_003515105.1        |
| <b>*<i>Pseudoalteromonas elyakovii</i> SM1926</b>        | <b>GCF_007786285.1</b> |
| <i>Pseudoalteromonas elyakovii</i> VKPM B-3905T          | JANJFO000000000        |
| <i>Pseudoalteromonas espejiana</i> DSM 9414T             | GCF_002221525.1        |
| <i>Pseudoalteromonas espejiana</i> NBRC 102222T          | GCF_007989585.1        |
| <i>Pseudoalteromonas flavipulchra</i> DSM 14401T         | GCF_014858715.1        |
| <i>Pseudoalteromonas flavipulchra</i> LMG 20361T         | GCF_014596995.1        |
| <i>Pseudoalteromonas fuliginea</i> KMM 216T              | GCF_000690055.1        |
| <i>Pseudoalteromonas galathea</i> S4498T                 | GCF_005886105.2        |
| <i>Pseudoalteromonas gelatinilytica</i> NH153T           | GCF_001641615.1        |
| <i>Pseudoalteromonas haloplanktis</i> ATCC 14393T        | GCF_000238355.1        |
| <i>Pseudoalteromonas issachenkonii</i> KCTC 12958        | GCF_001455325.1        |
| <i>Pseudoalteromonas issachenkonii</i> KMM 3549T         | GCF_002310795.1        |
| <i>Pseudoalteromonas lipolytica</i> CGMCC 1.8499T        | GCF_900116435.1        |
| <i>Pseudoalteromonas lipolytica</i> LMEB 39T             | GCF_014925285.1        |
| <i>Pseudoalteromonas luteoviolacea</i> CH130T            | GCF_014925325.1        |
| <i>Pseudoalteromonas luteoviolacea</i> DSM 6061T         | GCF_001625655.1        |
| <i>Pseudoalteromonas maricaloris</i> LMG 19692T          | GCF_012641725.1        |
| <i>Pseudoalteromonas marina</i> DSM 17587T               | GCF_000238335.3        |
| <i>Pseudoalteromonas mariniglutinosa</i> NCIMB 1770T     | GCF_021613355.1        |
| <i>Pseudoalteromonas neustonica</i> PAMC 28425T          | GCF_001653135.1        |
| <i>Pseudoalteromonas nigrifaciens</i> KMM 661T           | GCF_002221505.1        |
| <i>Pseudoalteromonas nigrifaciens</i> NBRC 103036T       | GCF_007991255.1        |
| <i>Pseudoalteromonas nigrifaciens</i> NCTC 10691T        | GCF_900455185.1        |
| <i>Pseudoalteromonas ostreae</i> hOe-66T                 | GCF_018069805.1        |
| <b>*<i>Pseudoalteromonas paragorgicola</i> KMM 3548T</b> | <b>GCF_014918315.1</b> |
| <i>Pseudoalteromonas peptidolytica</i> DSM 14001T        | GCF_012641745.1        |
| <i>Pseudoalteromonas peptidolytica</i> F12-50-A1T        | GCF_014858745.1        |
| <i>Pseudoalteromonas peptidolytica</i> NBRC 101021T      | GCF_007989895.1        |
| <i>Pseudoalteromonas phenolica</i> JCM 21460T            | GCF_014925335.1        |

|                                                          |                        |
|----------------------------------------------------------|------------------------|
| <i>Pseudoalteromonas phenolica</i> KCTC 12086T           | GCF_001444405.1        |
| <i>Pseudoalteromonas phenolica</i> O-BC30T               | GCF_004103265.1        |
| <i>Pseudoalteromonas piratica</i> OCN003T                | GCF_000788395.1        |
| <i>Pseudoalteromonas piscicida</i> ATCC 15057T           | GCF_000382005.1        |
| <i>Pseudoalteromonas piscicida</i> JCM 20779T            | GCF_000238315.3        |
| <i>Pseudoalteromonas profundus</i> CGMCC 1.15394T        | GCF_014642695.1        |
| <i>Pseudoalteromonas prydzensis</i> ACAM 620T            | GCF_014925355.1        |
| <i>Pseudoalteromonas prydzensis</i> DSM 14232T           | GCF_001661495.1        |
| <i>Pseudoalteromonas rhizosphaerae</i> RA15T             | GCF_902498845.1        |
| <i>Pseudoalteromonas rubra</i> DSM 6842T                 | GCF_000238295.3        |
| <i>Pseudoalteromonas ruthenica</i> LMG 19699T            | GCF_008808095.1        |
| <i>Pseudoalteromonas shioyasakiensis</i> JCM 18891T      | GCF_001550135.1        |
| <b>*<i>Pseudoalteromonas</i> sp. AC163</b>               | <b>GCF_000497935.1</b> |
| <b>*<i>Pseudoalteromonas</i> sp. TAE79</b>               | <b>GCF_000498015.1</b> |
| <b>*<i>Pseudoalteromonas</i> sp. TAE80</b>               | <b>GCF_000498035.1</b> |
| <b>*<i>Pseudoalteromonas</i> sp. TB25</b>                | <b>GCF_000497995.1</b> |
| " <i>Pseudoalteromonas spiralis</i> " DSM 16099          | GCF_001596815.1        |
| <i>Pseudoalteromonas spongiae</i> UST010723-006T         | GCF_000238255.3        |
| " <i>Pseudoalteromonas telluritireducens</i> " DSM 16098 | GCF_001596795.1        |
| <i>Pseudoalteromonas tetraodonis</i> GFCT                | GCF_002310835.1        |
| <i>Pseudoalteromonas tetraodonis</i> NBRC 103034T        | GCF_007991235.1        |
| <i>Pseudoalteromonas translucida</i> KMM 520T            | GCF_001465295.1        |
| <i>Pseudoalteromonas tunicata</i> D2T                    | GCF_000153245.1        |
| <i>Pseudoalteromonas tunicata</i> D2T                    | GCF_003568825.1        |
| <i>Pseudoalteromonas tunicata</i> DSM 14096T             | GCF_002310815.1        |
| <i>Pseudoalteromonas ulvae</i> UL12T                     | GCF_014925405.1        |
| <i>Pseudoalteromonas undina</i> DSM 6065T                | GCF_000238275.3        |

\*The strains belonging to the species *P. distincta* are in bold (this study)
