# Supplementary material for: Computational Insight into Intraspecies Distinctions in Pseudoalteromonas distincta: Carotenoid-like Synthesis Traits and Genomic Heterogeneity
Source: MDPI journal article supplement (doi:10.3390/ijms24044158), 2023-02-19
Supplement: s1 [file s1]

Table S3. The strains belonging to the species *Pseudoalteromonas distincta* according to the genome-based identification by EzBiocloud

| GenBank accession number        | Original name                                                         | Strain            | Source                    | Geographical origin                                 | Country | Year |
|---------------------------------|-----------------------------------------------------------------------|-------------------|---------------------------|-----------------------------------------------------|---------|------|
| <a href="#">GCA_000814675.1</a> | <i>Pseudoalteromonas distincta</i>                                    | ATCC 700518(Type) | Marine sponge             | Bering Sea, 109 miles east of Kamchatka Peninsula   | Russia  | 1989 |
| <a href="#">GCA_000497935.1</a> | <i>Pseudoalteromonas haloplanktis</i>                                 | AC163             | Antarctic marine sponge   | -                                                   | -       | -    |
| <a href="#">GCA_000497995.1</a> | <i>Pseudoalteromonas haloplanktis</i>                                 | TB25              | Antarctic marine sponge   | -                                                   | -       | -    |
| <a href="#">GCA_000498015.1</a> | <i>Pseudoalteromonas haloplanktis</i>                                 | TAE79             | Water column              | -                                                   | -       | -    |
| <a href="#">GCA_000498035.1</a> | <i>Pseudoalteromonas haloplanktis</i>                                 | TAE80             | Water column              | -                                                   | -       | -    |
| <a href="#">GCA_000212655.3</a> | <i>Pseudoalteromonas haloplanktis</i>                                 | ANT/505           | -                         | -                                                   | -       | -    |
| <a href="#">GCA_005877035.1</a> | <i>Pseudoalteromonas distincta</i>                                    | 16-SW-7           | Seawater                  | coastline of Kuril Isls, Okhotsk Sea, Pacific Ocean | Russia  | 2017 |
| <a href="#">GCA_007786285.1</a> | <i>Pseudoalteromonas elyakovii</i>                                    | SM1926            | -                         | -                                                   | -       | 2017 |
| <a href="#">GCA_008370225.1</a> | <i>Pseudoalteromonas distincta</i>                                    | U2A               | Algae surface(host:Fucus) | Willows Beach, Victoria, BC                         | Canada  | 2012 |
| <a href="#">GCA_000803085.1</a> | <i>Pseudoalteromonas flavipulchra</i><br>NCIMB 2033 =<br>ATCC BAA-314 | ATCC BAA-314      | Sea Water                 | Nice                                                | France  | 1978 |
