# Supplementary material for: Computational Insight into Intraspecies Distinctions in Pseudoalteromonas distincta: Carotenoid-like Synthesis Traits and Genomic Heterogeneity
Source: MDPI journal article supplement (doi:10.3390/ijms24044158), 2023-02-19
Supplement: s1 [file s1]

Table S11. Identifiers for genes from the genomic regions containing resorcinol and aryl polyene biosynthetic gene clusters.

| Strain                      | Location    | Locus tag                                                                                                                                                                    | AntiSMASH annotation          |
|-----------------------------|-------------|------------------------------------------------------------------------------------------------------------------------------------------------------------------------------|-------------------------------|
| <i>P. arctica</i> A 37-1-2T | NZ_CP011026 | PARC_RS19935                                                                                                                                                                 | Transport-related gene        |
|                             |             | PARC_RS19940<br>PARC_RS19945<br>PARC_RS19950<br>PARC_RS19955<br>PARC_RS19960                                                                                                 | Other genes                   |
|                             |             | PARC_RS19965                                                                                                                                                                 | Additional biosynthetic gene  |
|                             |             | PARC_RS19970<br>PARC_RS19980                                                                                                                                                 | Other genes                   |
|                             |             | PARC_RS19985                                                                                                                                                                 | Regulatory gene               |
|                             |             | PARC_RS19990                                                                                                                                                                 | Transport-related gene        |
|                             |             | PARC_RS20000                                                                                                                                                                 | Additional biosynthetic gene  |
|                             |             | PARC_RS20005<br>PARC_RS20010<br>PARC_RS20015<br>PARC_RS20020<br>PARC_RS21660<br>PARC_RS20025<br>PARC_RS20030<br>PARC_RS20035<br>PARC_RS20040<br>PARC_RS20045<br>PARC_RS20050 | Other genes                   |
|                             |             | PARC_RS20055                                                                                                                                                                 | Core biosynthetic gene        |
|                             |             | PARC_RS20060<br>PARC_RS20065<br>PARC_RS20070                                                                                                                                 | Other genes                   |
|                             |             | PARC_RS20075                                                                                                                                                                 | Additional biosynthetic gene  |
|                             |             | PARC_RS20080<br>PARC_RS20085                                                                                                                                                 | Transport-related genes       |
|                             |             | PARC_RS20090                                                                                                                                                                 | Other gene                    |
|                             |             | PARC_RS20095                                                                                                                                                                 | Core biosynthetic gene        |
|                             |             | PARC_RS20100<br>PARC_RS20105                                                                                                                                                 | Other genes                   |
|                             |             | PARC_RS20110<br>PARC_RS20115<br>PARC_RS20120                                                                                                                                 | Additional biosynthetic genes |
|                             |             | PARC_RS20125                                                                                                                                                                 | Other gene                    |
|                             |             | PARC_RS20130                                                                                                                                                                 | Additional biosynthetic gene  |

|                             |        |                                                                         |                               |
|-----------------------------|--------|-------------------------------------------------------------------------|-------------------------------|
|                             |        | PARC_RS20135                                                            | Other gene                    |
|                             |        | PARC_RS20140                                                            | Additional biosynthetic gene  |
|                             |        | PARC_RS20145<br>PARC_RS20150<br>PARC_RS20155<br>PARC_RS20160            | Other genes                   |
|                             |        | PARC_RS20165<br>PARC_RS20170                                            | Additional biosynthetic genes |
|                             |        | PARC_RS20175                                                            | Other gene                    |
|                             |        | PARC_RS20180                                                            | Core biosynthetic gene        |
|                             |        | PARC_RS20185                                                            | Other gene                    |
|                             |        | PARC_RS20190                                                            | Additional biosynthetic gene  |
|                             |        | PARC_RS20195                                                            | Core biosynthetic gene        |
|                             |        | PARC_RS20200<br>PARC_RS20205<br>PARC_RS20210                            | Other genes                   |
|                             |        | PARC_RS20215                                                            | Additional biosynthetic gene  |
|                             |        | PARC_RS20220<br>PARC_RS20225<br>PARC_RS20230<br>PARC_RS20235            | Other genes                   |
|                             |        | PARC_RS20240                                                            | Additional biosynthetic gene  |
|                             |        | PARC_RS20245<br>PARC_RS20250<br>PARC_RS20255                            | Other genes                   |
|                             |        | PARC_RS20260                                                            | Additional biosynthetic gene  |
|                             |        | PARC_RS20265                                                            | Regulatory gene               |
|                             |        | PARC_RS20270<br>PARC_RS20275<br>PARC_RS20280                            | Other genes                   |
| <i>P. distincta</i> 2-2A-13 | NODE_2 | NQU47_03185                                                             | Transport-related gene        |
|                             |        | NQU47_03180<br>NQU47_03175<br>NQU47_03170<br>NQU47_03165<br>NQU47_03160 | Other genes                   |
|                             |        | NQU47_03155                                                             | Additional biosynthetic gene  |
|                             |        |                                                                         |                               |

|  |  |                                                                                                                                                                                                 |                               |
|--|--|-------------------------------------------------------------------------------------------------------------------------------------------------------------------------------------------------|-------------------------------|
|  |  | NQU47_03150                                                                                                                                                                                     | Other gene                    |
|  |  | NQU47_03145                                                                                                                                                                                     | Regulatory gene               |
|  |  | NQU47_03140                                                                                                                                                                                     | Transport-related gene        |
|  |  | NQU47_03135                                                                                                                                                                                     | Additional biosynthetic gene  |
|  |  | NQU47_03130<br>NQU47_03125<br>NQU47_03120<br>NQU47_03115<br>NQU47_03110<br>NQU47_03105<br>NQU47_03100<br>NQU47_03095<br>NQU47_03090<br>NQU47_03085<br>NQU47_03080<br>NQU47_03075<br>NQU47_03070 | Other genes                   |
|  |  | NQU47_03065                                                                                                                                                                                     | Core biosynthetic gene        |
|  |  | NQU47_03060<br>NQU47_03055<br>NQU47_03050<br>NQU47_03045                                                                                                                                        | Other genes                   |
|  |  | NQU47_03040                                                                                                                                                                                     | Additional biosynthetic gene  |
|  |  | NQU47_03035<br>NQU47_03030                                                                                                                                                                      | Transport-related genes       |
|  |  | NQU47_03025                                                                                                                                                                                     | Other gene                    |
|  |  | NQU47_03020                                                                                                                                                                                     | Core biosynthetic gene        |
|  |  | NQU47_03015<br>NQU47_03010                                                                                                                                                                      | Other genes                   |
|  |  | NQU47_03005<br>NQU47_03000<br>NQU47_02995                                                                                                                                                       | Additional biosynthetic genes |
|  |  | NQU47_02990                                                                                                                                                                                     | Other gene                    |
|  |  | NQU47_02985                                                                                                                                                                                     | Additional biosynthetic gene  |
|  |  | NQU47_02980                                                                                                                                                                                     | Other gene                    |
|  |  | NQU47_02975                                                                                                                                                                                     | Additional biosynthetic gene  |
|  |  | NQU47_02970<br>NQU47_02965<br>NQU47_02960                                                                                                                                                       | Other genes                   |

|                                               |                 |                                                                              |                               |
|-----------------------------------------------|-----------------|------------------------------------------------------------------------------|-------------------------------|
|                                               |                 | NQU47_02955                                                                  |                               |
|                                               |                 | NQU47_02950<br>NQU47_02945                                                   | Additional biosynthetic genes |
|                                               |                 | NQU47_02940                                                                  | Other gene                    |
|                                               |                 | NQU47_02935                                                                  | Core biosynthetic gene        |
|                                               |                 | NQU47_02930                                                                  | Other gene                    |
|                                               |                 | NQU47_02925                                                                  | Additional biosynthetic gene  |
|                                               |                 | NQU47_02920                                                                  | Core biosynthetic gene        |
|                                               |                 | NQU47_02915<br>NQU47_02910<br>NQU47_02905                                    | Other genes                   |
|                                               |                 | NQU47_02900                                                                  | Additional biosynthetic gene  |
|                                               |                 | NQU47_02895<br>NQU47_02890<br>NQU47_02885                                    | Other genes                   |
|                                               |                 | NQU47_02880                                                                  | Additional biosynthetic gene  |
|                                               |                 | NQU47_02875<br>NQU47_02870<br>NQU47_02865                                    | Other genes                   |
|                                               |                 | NQU47_02860                                                                  | Additional biosynthetic gene  |
|                                               |                 | NQU47_02855                                                                  | Regulatory gene               |
|                                               |                 | NQU47_02850<br>NQU47_02845<br>NQU47_02840                                    | Other genes                   |
| <i>P. paragorgicola</i> KMM 3548 <sup>T</sup> | NZ_AQHE01000022 | PPAR_RS18555                                                                 | Transport-related gene        |
|                                               |                 | PPAR_RS18560<br>PPAR_RS18565<br>PPAR_RS18570<br>PPAR_RS18575<br>PPAR_RS18580 | Other genes                   |
|                                               |                 | PPAR_RS18585                                                                 | Additional biosynthetic gene  |
|                                               |                 | PPAR_RS18590                                                                 | Other gene                    |
|                                               |                 | PPAR_RS18595                                                                 | Regulatory gene               |
|                                               |                 | PPAR_RS18600                                                                 | Transport-related gene        |
|                                               |                 | PPAR_RS18605                                                                 | Additional biosynthetic gene  |
|                                               |                 | PPAR_RS18610                                                                 | Other genes                   |

|  |  |                                                                                                                                                              |                               |
|--|--|--------------------------------------------------------------------------------------------------------------------------------------------------------------|-------------------------------|
|  |  | PPAR_RS18615<br>PPAR_RS18620<br>PPAR_RS18625<br>PPAR_RS18630<br>PPAR_RS18635<br>PPAR_RS18640<br>PPAR_RS18645<br>PPAR_RS18650<br>PPAR_RS18655<br>PPAR_RS18660 |                               |
|  |  | PPAR_RS18665                                                                                                                                                 | Core biosynthetic gene        |
|  |  | PPAR_RS18670<br>PPAR_RS18675<br>PPAR_RS18680<br>PPAR_RS18685                                                                                                 | Other genes                   |
|  |  | PPAR_RS18690                                                                                                                                                 | Additional biosynthetic gene  |
|  |  | PPAR_RS18695                                                                                                                                                 | Transport-related gene        |
|  |  | PPAR_RS18700<br>PPAR_RS18705                                                                                                                                 | Other genes                   |
|  |  | PPAR_RS18710                                                                                                                                                 | Core biosynthetic gene        |
|  |  | PPAR_RS18715<br>PPAR_RS18720                                                                                                                                 | Other genes                   |
|  |  | PPAR_RS18725<br>PPAR_RS18730<br>PPAR_RS18735                                                                                                                 | Additional biosynthetic genes |
|  |  | PPAR_RS18740                                                                                                                                                 | Other gene                    |
|  |  | PPAR_RS18745                                                                                                                                                 | Additional biosynthetic gene  |
|  |  | PPAR_RS18750                                                                                                                                                 | Other gene                    |
|  |  | PPAR_RS18755                                                                                                                                                 | Additional biosynthetic gene  |
|  |  | PPAR_RS18760<br>PPAR_RS18765<br>PPAR_RS18770<br>PPAR_RS18775                                                                                                 | Other genes                   |
|  |  | PPAR_RS18780<br>PPAR_RS18785                                                                                                                                 | Additional biosynthetic genes |
|  |  | PPAR_RS18790                                                                                                                                                 | Other gene                    |
|  |  | PPAR_RS18795                                                                                                                                                 | Core biosynthetic gene        |
|  |  | PPAR_RS18800                                                                                                                                                 | Other gene                    |
|  |  | PPAR_RS18805                                                                                                                                                 | Additional biosynthetic gene  |

|                                              |             |                                                              |                               |
|----------------------------------------------|-------------|--------------------------------------------------------------|-------------------------------|
|                                              |             | PPAR_RS18810                                                 | Core biosynthetic gene        |
|                                              |             | PPAR_RS18815<br>PPAR_RS18820<br>PPAR_RS18825                 | Other genes                   |
|                                              |             | PPAR_RS18830                                                 | Additional biosynthetic gene  |
|                                              |             | PPAR_RS18835<br>PPAR_RS18840<br>PPAR_RS18845                 | Other genes                   |
|                                              |             | PPAR_RS18850                                                 | Additional biosynthetic gene  |
|                                              |             | PPAR_RS18855<br>PPAR_RS18860<br>PPAR_RS18865                 | Other genes                   |
|                                              |             | PPAR_RS18870                                                 | Additional biosynthetic gene  |
|                                              |             | PPAR_RS18875                                                 | Regulatory gene               |
|                                              |             | PPAR_RS18880<br>PPAR_RS18885<br>PPAR_RS18890                 | Other genes                   |
|                                              |             |                                                              |                               |
| <i>P. agarivorans</i> DSM 14585 <sup>T</sup> | NZ_CP011012 | PAGA_RS19690<br>PAGA_RS19695                                 | Other genes                   |
|                                              |             | PAGA_RS19700                                                 | Regulatory gene               |
|                                              |             | PAGA_RS19705                                                 | Transport-related gene        |
|                                              |             | PAGA_RS19710                                                 | Additional biosynthetic gene  |
|                                              |             | PAGA_RS19715<br>PAGA_RS19720<br>PAGA_RS19725<br>PAGA_RS19730 | Other genes                   |
|                                              |             | PAGA_RS19735<br>PAGA_RS19740<br>PAGA_RS19745                 | Additional biosynthetic genes |
|                                              |             | PAGA_RS19750                                                 | Other gene                    |
|                                              |             | PAGA_RS19755                                                 | Additional biosynthetic gene  |
|                                              |             | PAGA_RS19760                                                 | Other gene                    |
|                                              |             | PAGA_RS19765                                                 | Additional biosynthetic gene  |
|                                              |             | PAGA_RS19770<br>PAGA_RS19775<br>PAGA_RS19780<br>PAGA_RS19785 | Other genes                   |
|                                              |             |                                                              |                               |

|                                            |                 |                                                                                              |                               |
|--------------------------------------------|-----------------|----------------------------------------------------------------------------------------------|-------------------------------|
|                                            |                 | PAGA_RS19790                                                                                 |                               |
|                                            |                 | PAGA_RS19795                                                                                 | Additional biosynthetic gene  |
|                                            |                 | PAGA_RS19800                                                                                 | Other gene                    |
|                                            |                 | PAGA_RS19805                                                                                 | Core biosynthetic gene        |
|                                            |                 | PAGA_RS19810                                                                                 | Other gene                    |
|                                            |                 | PAGA_RS19815                                                                                 | Additional biosynthetic gene  |
|                                            |                 | PAGA_RS19820                                                                                 | Core biosynthetic gene        |
|                                            |                 | PAGA_RS19825<br>PAGA_RS19830<br>PAGA_RS19835<br>PAGA_RS19840<br>PAGA_RS19845<br>PAGA_RS19850 | Other genes                   |
|                                            |                 | PAGA_RS19855                                                                                 | Additional biosynthetic gene  |
|                                            |                 | PAGA_RS19860<br>PAGA_RS19865<br>PAGA_RS19870                                                 | Other genes                   |
|                                            |                 | PAGA_RS19875                                                                                 | Additional biosynthetic gene  |
|                                            |                 | PAGA_RS19880                                                                                 | Regulatory gene               |
|                                            |                 | PAGA_RS19885<br>PAGA_RS19890<br>PAGA_RS19895                                                 | Other genes                   |
|                                            |                 | PAGA_RS19900                                                                                 | Additional biosynthetic gene  |
| <i>"P. telluritireducens"</i><br>DSM 16098 | NZ_LVCM01000051 | A2I98_RS17895<br>A2I98_RS17900                                                               | Other genes                   |
|                                            |                 | A2I98_RS17905                                                                                | Regulatory gene               |
|                                            |                 | A2I98_RS17910                                                                                | Transport-related gene        |
|                                            |                 | A2I98_RS17915                                                                                | Additional biosynthetic gene  |
|                                            |                 | A2I98_RS17920<br>A2I98_RS17925<br>A2I98_RS17930<br>A2I98_RS17935                             | Other genes                   |
|                                            |                 | A2I98_RS17940<br>A2I98_RS17945<br>A2I98_RS17950                                              | Additional biosynthetic genes |
|                                            |                 | A2I98_RS17955                                                                                | Other gene                    |

|                                                 |                 |                                                                                   |                              |
|-------------------------------------------------|-----------------|-----------------------------------------------------------------------------------|------------------------------|
|                                                 |                 | A2I98_RS17960                                                                     | Additional biosynthetic gene |
|                                                 |                 | A2I98_RS20735<br>A2I98_RS17965                                                    | Other genes                  |
|                                                 |                 | A2I98_RS17970                                                                     | Additional biosynthetic gene |
|                                                 |                 | A2I98_RS17975<br>A2I98_RS17980<br>A2I98_RS17985<br>A2I98_RS17990<br>A2I98_RS17995 | Other genes                  |
|                                                 |                 | A2I98_RS18000                                                                     | Additional biosynthetic gene |
|                                                 |                 | A2I98_RS18005                                                                     | Other gene                   |
|                                                 |                 | A2I98_RS18010                                                                     | Core biosynthetic gene       |
|                                                 |                 | A2I98_RS18015                                                                     | Other gene                   |
|                                                 |                 | A2I98_RS18020                                                                     | Additional biosynthetic gene |
|                                                 |                 | A2I98_RS18025                                                                     | Core biosynthetic gene       |
|                                                 |                 | A2I98_RS18030<br>A2I98_RS18035<br>A2I98_RS18040<br>A2I98_RS18045<br>A2I98_RS18050 | Other genes                  |
|                                                 |                 | A2I98_RS18055                                                                     | Additional biosynthetic gene |
|                                                 |                 | A2I98_RS18060<br>A2I98_RS18065<br>A2I98_RS18070                                   | Other genes                  |
|                                                 |                 | A2I98_RS18075                                                                     | Additional biosynthetic gene |
|                                                 |                 | A2I98_RS18080                                                                     | Regulatory gene              |
|                                                 |                 | A2I98_RS18085<br>A2I98_RS18090<br>A2I98_RS18095                                   | Other genes                  |
|                                                 |                 | A2I98_RS18100                                                                     | Additional biosynthetic gene |
|                                                 |                 | A2I98_RS18105                                                                     | Other gene                   |
| <i>P. nigrifaciens</i> NBRC 103036 <sup>T</sup> | NZ_BJXZ01000017 | PN102_RS08160                                                                     | Regulatory gene              |
|                                                 |                 | PN102_RS19015<br>PN102_RS08165                                                    | Other genes                  |
|                                                 |                 | PN102_RS08170                                                                     | Transport-related gene       |



|  |  |                                                                                                                                      |                               |
|--|--|--------------------------------------------------------------------------------------------------------------------------------------|-------------------------------|
|  |  | PNI02_RS08175<br>PNI02_RS08180<br>PNI02_RS08185                                                                                      | Other genes                   |
|  |  | PNI02_RS08190<br>PNI02_RS08195<br>PNI02_RS08200                                                                                      | Additional biosynthetic genes |
|  |  | PNI02_RS08205                                                                                                                        | Other gene                    |
|  |  | PNI02_RS08210                                                                                                                        | Additional biosynthetic gene  |
|  |  | PNI02_RS08215                                                                                                                        | Other gene                    |
|  |  | PNI02_RS08220                                                                                                                        | Additional biosynthetic gene  |
|  |  | PNI02_RS08225<br>PNI02_RS08230<br>PNI02_RS08235<br>PNI02_RS08240<br>PNI02_RS08245                                                    | Other genes                   |
|  |  | PNI02_RS08250                                                                                                                        | Additional biosynthetic gene  |
|  |  | PNI02_RS08255                                                                                                                        | Other gene                    |
|  |  | PNI02_RS08260                                                                                                                        | Core biosynthetic gene        |
|  |  | PNI02_RS08265                                                                                                                        | Other gene                    |
|  |  | PNI02_RS08270                                                                                                                        | Additional biosynthetic gene  |
|  |  | PNI02_RS08275                                                                                                                        | Core biosynthetic gene        |
|  |  | PNI02_RS08280<br>PNI02_RS08285<br>PNI02_RS08290<br>PNI02_RS08295<br>PNI02_RS19105<br>PNI02_RS08305<br>PNI02_RS08310<br>PNI02_RS08315 | Other genes                   |
|  |  | PNI02_RS08320                                                                                                                        | Additional biosynthetic gene  |
|  |  | PNI02_RS08325                                                                                                                        | Regulatory gene               |
|  |  | PNI02_RS08330<br>PNI02_RS08335<br>PNI02_RS08340<br>PNI02_RS08345                                                                     | Other genes                   |
|  |  | PNI02_RS08350                                                                                                                        | Additional biosynthetic gene  |
|  |  | PNI02_RS08355                                                                                                                        | Other gene                    |

|                                            |             |                                                                              |                               |
|--------------------------------------------|-------------|------------------------------------------------------------------------------|-------------------------------|
|                                            |             | PNI02_RS08360                                                                | Additional biosynthetic gene  |
| <i>P. translucida</i> KMM 520 <sup>r</sup> | NZ_CP011035 | PTRA_RS19000<br>PTRA_RS17890                                                 | Other genes                   |
|                                            |             | PTRA_RS17895<br>PTRA_RS17900<br>PTRA_RS17905                                 | Regulatory genes              |
|                                            |             | PTRA_RS17910                                                                 | Transport-related gene        |
|                                            |             | PTRA_RS17915<br>PTRA_RS17920<br>PTRA_RS17925                                 | Other genes                   |
|                                            |             | PTRA_RS17930<br>PTRA_RS17935<br>PTRA_RS17940                                 | Additional biosynthetic genes |
|                                            |             | PTRA_RS17945                                                                 | Other gene                    |
|                                            |             | PTRA_RS17950                                                                 | Additional biosynthetic gene  |
|                                            |             | PTRA_RS17955                                                                 | Other gene                    |
|                                            |             | PTRA_RS17960                                                                 | Additional biosynthetic gene  |
|                                            |             | PTRA_RS17965<br>PTRA_RS17970<br>PTRA_RS17975<br>PTRA_RS17980<br>PTRA_RS17985 | Other genes                   |
|                                            |             | PTRA_RS17990                                                                 | Additional biosynthetic gene  |
|                                            |             | PTRA_RS17995                                                                 | Other gene                    |
|                                            |             | PTRA_RS18000                                                                 | Core biosynthetic gene        |
|                                            |             | PTRA_RS18005<br>PTRA_RS18010                                                 | Other genes                   |
|                                            |             | PTRA_RS18015                                                                 | Additional biosynthetic gene  |
|                                            |             | PTRA_RS18020                                                                 | Core biosynthetic gene        |
|                                            |             | PTRA_RS18025<br>PTRA_RS18030<br>PTRA_RS18035<br>PTRA_RS18040                 | Other genes                   |
|                                            |             | PTRA_RS18045                                                                 | Additional biosynthetic gene  |
|                                            |             | PTRA_RS18050<br>PTRA_RS18055<br>PTRA_RS18060                                 | Other genes                   |

|                             |                 |                                                                                                                                      |                               |
|-----------------------------|-----------------|--------------------------------------------------------------------------------------------------------------------------------------|-------------------------------|
|                             |                 | PTRA_RS18065                                                                                                                         | Additional biosynthetic gene  |
|                             |                 | PTRA_RS18070                                                                                                                         | Regulatory gene               |
|                             |                 | PTRA_RS19310<br>PTRA_RS18075<br>PTRA_RS18080<br>PTRA_RS18085                                                                         | Other genes                   |
|                             |                 | PTRA_RS18090                                                                                                                         | Additional biosynthetic gene  |
| <i>P. distincta</i> ANT/505 | NZ_ADOP01000007 | PH505_RS04320                                                                                                                        | Additional biosynthetic gene  |
|                             |                 | PH505_RS04315<br>PH505_RS04310<br>PH505_RS04305<br>PH505_RS04300<br>PH505_RS04295<br>PH505_RS04290<br>PH505_RS04285<br>PH505_RS04280 | Other genes                   |
|                             |                 | PH505_RS04275<br>PH505_RS04270<br>PH505_RS04265                                                                                      | Additional biosynthetic genes |
|                             |                 | PH505_RS04260                                                                                                                        | Other gene                    |
|                             |                 | PH505_RS04255                                                                                                                        | Additional biosynthetic gene  |
|                             |                 | PH505_RS04250                                                                                                                        | Other gene                    |
|                             |                 | PH505_RS04245                                                                                                                        | Additional biosynthetic gene  |
|                             |                 | PH505_RS04240<br>PH505_RS04235<br>PH505_RS04230<br>PH505_RS04225<br>PH505_RS04220                                                    | Other genes                   |
|                             |                 | PH505_RS04215                                                                                                                        | Additional biosynthetic gene  |
|                             |                 | PH505_RS04210                                                                                                                        | Other gene                    |
|                             |                 | PH505_RS04205                                                                                                                        | Core biosynthetic gene        |
|                             |                 | PH505_RS04200                                                                                                                        | Other gene                    |
|                             |                 | PH505_RS04195                                                                                                                        | Additional biosynthetic gene  |
|                             |                 | PH505_RS04190                                                                                                                        | Core biosynthetic gene        |
|                             |                 | PH505_RS04185                                                                                                                        | Other gene                    |

|                                       |                 |                                                                                                          |                               |
|---------------------------------------|-----------------|----------------------------------------------------------------------------------------------------------|-------------------------------|
|                                       |                 | PH505_RS04180                                                                                            | Additional biosynthetic gene  |
|                                       |                 | PH505_RS04175<br>PH505_RS04170<br>PH505_RS04165<br>PH505_RS04160                                         | Other genes                   |
|                                       |                 | PH505_RS04155                                                                                            | Additional biosynthetic gene  |
|                                       |                 | PH505_RS04150<br>PH505_RS04145<br>PH505_RS04140                                                          | Other genes                   |
|                                       |                 | PH505_RS04135                                                                                            | Additional biosynthetic gene  |
|                                       |                 | PH505_RS04130                                                                                            | Regulatory gene               |
|                                       |                 | PH505_RS04125<br>PH505_RS04120<br>PH505_RS04115<br>PH505_RS04110<br>PH505_RS04105                        | Other genes                   |
|                                       |                 |                                                                                                          |                               |
| <i>Pseudoalteromonas</i> sp.<br>TAE79 | NZ_AUTL01000264 | L655_RS0120600<br>L655_RS0120605<br>L655_RS0120610<br>L655_RS0120615<br>L655_RS0120620<br>L655_RS0120625 | Other genes                   |
|                                       |                 | L655_RS0120630<br>L655_RS0120635<br>L655_RS0120640                                                       | Additional biosynthetic genes |
|                                       |                 | L655_RS0120645                                                                                           | Other gene                    |
|                                       |                 | L655_RS0120650                                                                                           | Additional biosynthetic gene  |
|                                       |                 | L655_RS0120655                                                                                           | Other gene                    |
|                                       |                 | L655_RS0120660                                                                                           | Additional biosynthetic gene  |
|                                       |                 | L655_RS0120665<br>L655_RS0120670<br>L655_RS0120675<br>L655_RS0120680<br>L655_RS0120685                   | Other genes                   |
|                                       |                 | L655_RS0120690                                                                                           | Additional biosynthetic gene  |
|                                       |                 | L655_RS0120695                                                                                           | Other gene                    |
|                                       |                 | L655_RS0120700                                                                                           | Core biosynthetic gene        |
|                                       |                 |                                                                                                          |                               |
|                                       |                 |                                                                                                          |                               |

|                                       |                 |                                                                                                                                  |                               |
|---------------------------------------|-----------------|----------------------------------------------------------------------------------------------------------------------------------|-------------------------------|
|                                       |                 | L655_RS0120705                                                                                                                   | Other gene                    |
|                                       |                 | L655_RS0120710                                                                                                                   | Additional biosynthetic gene  |
|                                       |                 | L655_RS01000000125975                                                                                                            | Core biosynthetic gene        |
|                                       |                 | L655_RS0120720                                                                                                                   | Other gene                    |
|                                       |                 | L655_RS0120725                                                                                                                   | Additional biosynthetic gene  |
|                                       |                 | L655_RS0120730                                                                                                                   | Other gene                    |
| <i>Pseudoalteromonas</i> sp.<br>TAE80 | NZ_AUTM01000285 | L657_RS0118550<br>L657_RS1000000127615<br>L657_RS0118545<br>L657_RS0118540<br>L657_RS0118535<br>L657_RS0118530<br>L657_RS0118525 | Other genes                   |
|                                       |                 | L657_RS0118520<br>L657_RS0118515<br>L657_RS0118510                                                                               | Additional biosynthetic genes |
|                                       |                 | L657_RS0118505                                                                                                                   | Other gene                    |
|                                       |                 | L657_RS0118500                                                                                                                   | Additional biosynthetic gene  |
|                                       |                 | L657_RS0118495                                                                                                                   | Other gene                    |
|                                       |                 | L657_RS0118490                                                                                                                   | Additional biosynthetic gene  |
|                                       |                 | L657_RS0118485<br>L657_RS0118480<br>L657_RS0118475<br>L657_RS0118470<br>L657_RS0118465                                           | Other genes                   |
|                                       |                 | L657_RS0118460                                                                                                                   | Additional biosynthetic gene  |
|                                       |                 | L657_RS0118455                                                                                                                   | Other gene                    |
|                                       |                 | L657_RS0118450                                                                                                                   | Core biosynthetic gene        |
|                                       |                 | L657_RS0118445                                                                                                                   | Other gene                    |
|                                       |                 | L657_RS0118440                                                                                                                   | Additional biosynthetic gene  |
|                                       |                 | L657_RS0118435                                                                                                                   | Core biosynthetic gene        |
|                                       |                 | L657_RS0118430                                                                                                                   | Other gene                    |
|                                       |                 | L657_RS0118425                                                                                                                   | Additional biosynthetic gene  |
|                                       |                 | L657_RS0118420                                                                                                                   | Other gene                    |
