# Supplementary material for: Computational Insight into Intraspecies Distinctions in Pseudoalteromonas distincta: Carotenoid-like Synthesis Traits and Genomic Heterogeneity
Source: MDPI journal article supplement (doi:10.3390/ijms24044158), 2023-02-19
Supplement: s1 [file s1]

Table S9. Prediction of MetaCyc pathways for streptorubin B biosynthesis (PWY1A0-6120), methylerythritol phosphate pathway II (PWY-7560), and 4,4'-diapolycondensed biosynthesis (PWY-6767) in *P. distincta*\* and *P. arctica* A 37-1-2<sup>T</sup>

|                                 |                                                   |                                                         |                                                      |                                                      |                                                   |                                                         |                                                 |                                     |
|---------------------------------|---------------------------------------------------|---------------------------------------------------------|------------------------------------------------------|------------------------------------------------------|---------------------------------------------------|---------------------------------------------------------|-------------------------------------------------|-------------------------------------|
| <b>PWY1A0-6120</b>              | <b>2.3.1.180</b>                                  | <b>4.2.1.59/4.2.1.58/4.2.1.60/4.2.1.61**</b>            | <b>1.1.1.100</b>                                     | <b>2.3.1.179/2.3.1.41**</b>                          | <b>1.3.8.14</b>                                   | <b>4.2.1.59/4.2.1.58/4.2.1.60/4.2.1.61**</b>            | <b>2.3.1.179/2.3.1.41**</b>                     | <b>1.3.1.9</b>                      |
| Direction                       | <                                                 | >                                                       | >                                                    | >                                                    | <                                                 | <                                                       | <                                               | <                                   |
| Enzyme                          | beta-ketoacyl-[acyl-carrier-protein] synthase III | (3R)-3-hydroxybutanoyl-[acyl-carrier-protein] hydratase | 3-hydroxyhexanoyl-[acyl-carrier-protein] reductase   | 3-oxodecanoyl-[acyl-carrier-protein] synthase        | L-prolyl-[peptidyl-carrier-protein] dehydratase   | (3R)-3-hydroxybutanoyl-[acyl-carrier-protein] hydratase | 3-oxodecanoyl-[acyl-carrier-protein] synthase   | trans dodec-2-enoyl-[acp] reductase |
| Coordinates*                    | 614287..613340                                    | 891550..891996                                          | 1196519..1197253                                     | 1197966..1199195                                     | 1463979..1462870                                  | 1498431..1497928                                        | 2326647..2325451                                | 25176842516524                      |
| <b>PWY-7560<br/>PWY-6767***</b> | <b>2.2.1.7/4.1.3.37</b>                           | <b>2.7.7.60</b>                                         | <b>4.6.1.12</b>                                      | <b>1.17.7.1/1.17.4.3</b>                             | <b>2.7.1.148</b>                                  | <b>1.17.7.4/1.17.1.2</b>                                | <b>1.1.1.267</b>                                | <b>1.2.99.10**</b>                  |
| Direction                       | >                                                 | >                                                       | >                                                    | >                                                    | >                                                 | >                                                       | <                                               | >                                   |
| Enzyme                          | 1-deoxy-D-xylulose 5-phosphate synthase           | 4-diphosphocytidyl-2C-methyl-D-erythritol synthase      | 2C-methyl-D-erythritol 2,4-cyclodiphosphate synthase | 4-hydroxy-3-methylbut-2-en-1-yl diphosphate synthase | 4-diphosphocytidyl-2-C-methyl-D-erythritol kinase | dimethylallyl-diphosphate: NAD(P)+ oxidoreductase       | 1-deoxy-D-xylulose 5-phosphate reductoisomerase | 4,4'-diapolycondensed biosynthesis  |
| Coordinates*                    | 8409..10286                                       | 24085..24753                                            | 24765..25247                                         | 33428..34465                                         | 42401..43246                                      | 54265..55209                                            | 105366..104299                                  | NODE_4_length_233017_cov_73.836012  |

\* - related to the *P. distincta* 2-2A-13 genome (GenBank: JANIHL010000000); \*\* - duplicated key genes; \*\*\* - related to MetaCyc Reaction ID: RXN-12225 (PWY-6767).
