# Supplementary material for: Computational Insight into Intraspecies Distinctions in Pseudoalteromonas distincta: Carotenoid-like Synthesis Traits and Genomic Heterogeneity
Source: MDPI journal article supplement (doi:10.3390/ijms24044158), 2023-02-19
Supplement: s1 [file s1]

Table S1. The 16S rRNA gene sequences content and similarity for the strains *P. distincta* 16-SW-7, *P. distincta* ATCC 700518<sup>T</sup>, *P. distincta* KMM 3548<sup>T</sup>, and *P. arctica* A 37-1-2<sup>T</sup> (from the alignment on query gene of the strain 16-SW-7 under the locus\_tag FFU37\_04590)

| Genome Name                                                                 | NCBI Homolog 16S rRNA (Locus_tag) | Identity % | Genome ID       | Chromosome (Contig)/ Length | Coordinates      |
|-----------------------------------------------------------------------------|-----------------------------------|------------|-----------------|-----------------------------|------------------|
| <i>Pseudoalteromonas distincta</i> 16-SW-7                                  | FFU37_04590                       | 100.00     | CP040558        | L1/3735685                  | 1023946..1025481 |
|                                                                             | FFU37_00210                       | 100.00     | CP040558        | L1/ 3735685                 | 48439..49974     |
|                                                                             | FFU37_18380                       | 99.94      | CP040559        | S1/795760                   | 375599..377134   |
|                                                                             | FFU37_15325                       | 99.94      | CP040558        | L1/3735685                  | 3416198..3417733 |
|                                                                             | FFU37_14755                       | 99.94      | CP040558        | L1/3735685                  | 3277653..3279188 |
|                                                                             | FFU37_15610                       | 99.87      | CP040558        | L1/3735685                  | 3477632..3479167 |
|                                                                             | FFU37_14215                       | 99.87      | CP040558        | L1/3735685                  | 3172769..3174304 |
|                                                                             | FFU37_00060                       | 99.87      | CP040558        | L1/3735685                  | 16934..18469     |
| <i>Pseudoalteromonas arctica</i> A 37-1-2 <sup>T</sup>                      | PARC_bR026                        | 100.00     | CP011026        | Chr II/ 783876              | 192599..194122   |
|                                                                             | PARC_aR001                        | 99.61      | CP011025        | Chr I/ 3840834              | 36983..38506     |
|                                                                             | PARC_aR004                        | 99.67      | CP011025        | Chr I/ 3840834              | 313581..315104   |
|                                                                             | PARC_aR007                        | 99.28      | CP011025        | Chr I/ 3840834              | 345719..347242   |
|                                                                             | PARC_aR012                        | 99.34      | CP011025        | Chr I/ 3840834              | 2483422..2484945 |
|                                                                             | PARC_aR016                        | 99.67      | CP011025        | Chr I/ 3840834              | 3068857..3070380 |
|                                                                             | PARC_aR019                        | 99.28      | CP011025        | Chr I/ 3840834              | 3589860..3591383 |
|                                                                             | PARC_aR022                        | 99.67      | CP011025        | Chr I/ 3840834              | 3690377..3691900 |
|                                                                             | PARC_aR025                        | 99.67      | CP011025        | Chr I/ 3840834              | 3815090..3816613 |
| <i>Pseudoalteromonas distincta</i> KMM 3548<br>(= <i>P. paragorgicola</i> ) | PPAR_aR004                        | 99.87      | AQHE01000014    | 14/ 767276                  | 187495..189018   |
|                                                                             | PPAR_aR007                        | 100.00     | AQHE01000021    | 21/ 300025                  | 298305..299828   |
| <i>Pseudoalteromonas distincta</i> 2-2A-13                                  | NQU47_RS19790                     | 100.00     | JANIHL010000061 | Contig 61/1771              | 192..1727        |
| <i>Pseudoalteromonas distincta</i> ATCC 700518 <sup>T</sup>                 | QT16_19995                        | 99.94      | JWIG01000030    | C30/ 180150                 | 175393..176935   |
